# Supplementary material for: A method for the synthesis of 2-oxazolidinones and 2-imidazolidinones from five-membered cyclic carbonates and β-aminoalcohols or 1,2-diamines
Source: Royal Society of Chemistry journal article supplement (doi:10.1039/b609967j), 2007-01-01
Supplement: b609967j.pdf [file b609967j.pdf]

## Supporting Information

# **A novel method for the synthesis of 2-oxazolidinones and 2-imidazolidinones from five-membered cyclic carbonates and $\beta$ -aminoalcohols or 1,2-diamines**

Lin-fei Xiao, Li-wen Xu, and Chun-gu Xia

*State Key Laboratory for Oxo Synthesis and Selective Oxidation , Lanzhou Institute of Chemical Physics, Chinese Academy of Sciences and Graduate School of Chinese Academy of Science, Lanzhou, 730000, P. R. China.*

### **Experimental section**

All reaction flask and solvent were used directly without purification. Flash column chromatography was performed over silica (100-200 mesh). NMR spectra were recorded on a 400-MHz spectrometer.  $^{13}\text{C}$  NMR spectra were obtained with broadband proton decoupling. For spectra recorded in  $\text{D}_2\text{O}$  and  $\text{CDCl}_3$ , unless noted, chemical shifts were recorded relative to the internal TMS (tetramethylsilane) reference signal. Thin layer chromatography was performed using Silica.

### **Typical reaction procedure:**

For each reaction, cyclic carbonate (10 mmol),  $\beta$ -aminoalcohols or 1,2-diamines (10 mmol) in DMF (5 ml) and potassium carbonate (0.1 mmol) were charged into a 25ml round-bottomed flask equipped with a magnetic stirrer at 80 °C for 5h. All the product were known compounds<sup>1</sup> and the obtained products were analyzed on a Hewlett-Packard 6890/5973 GC-MS and NMR. Quantitative analyses were carried out over a Agilent 6820 GC and column chromatography on a silica gel (200-300 mesh, eluent: methanol/dichloromethane 1:10).

**$^1\text{H}$  and  $^{13}\text{C}$  NMR spectra of 2-oxazolidinones and 2-imidazolidinones:**

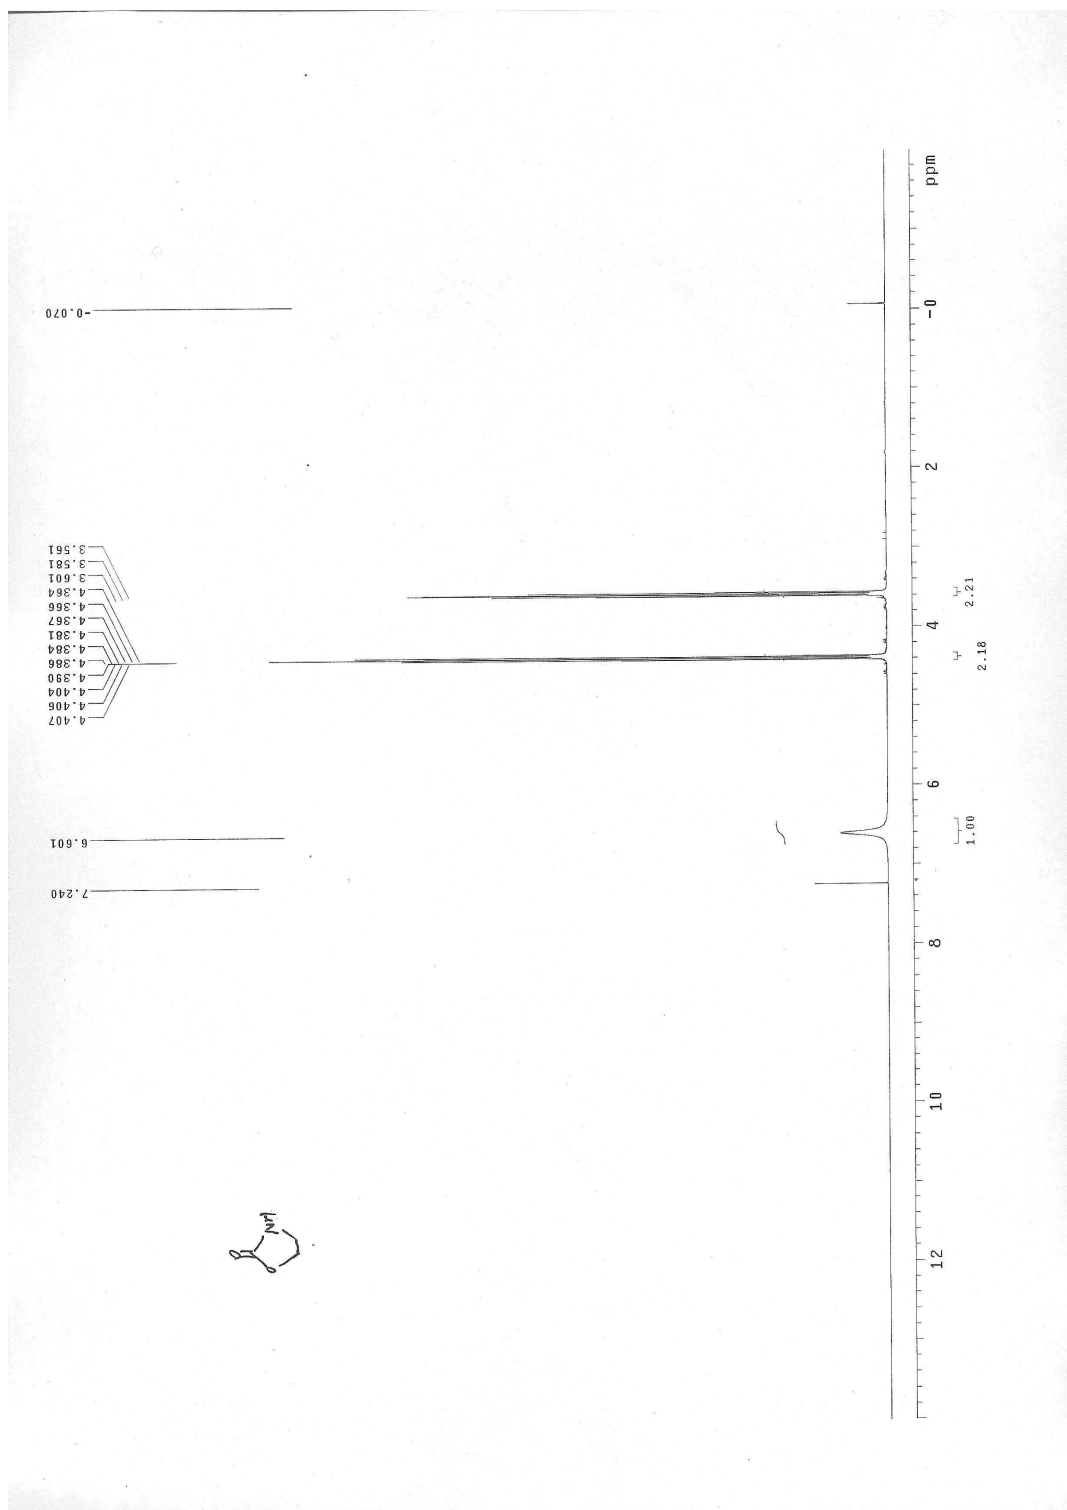

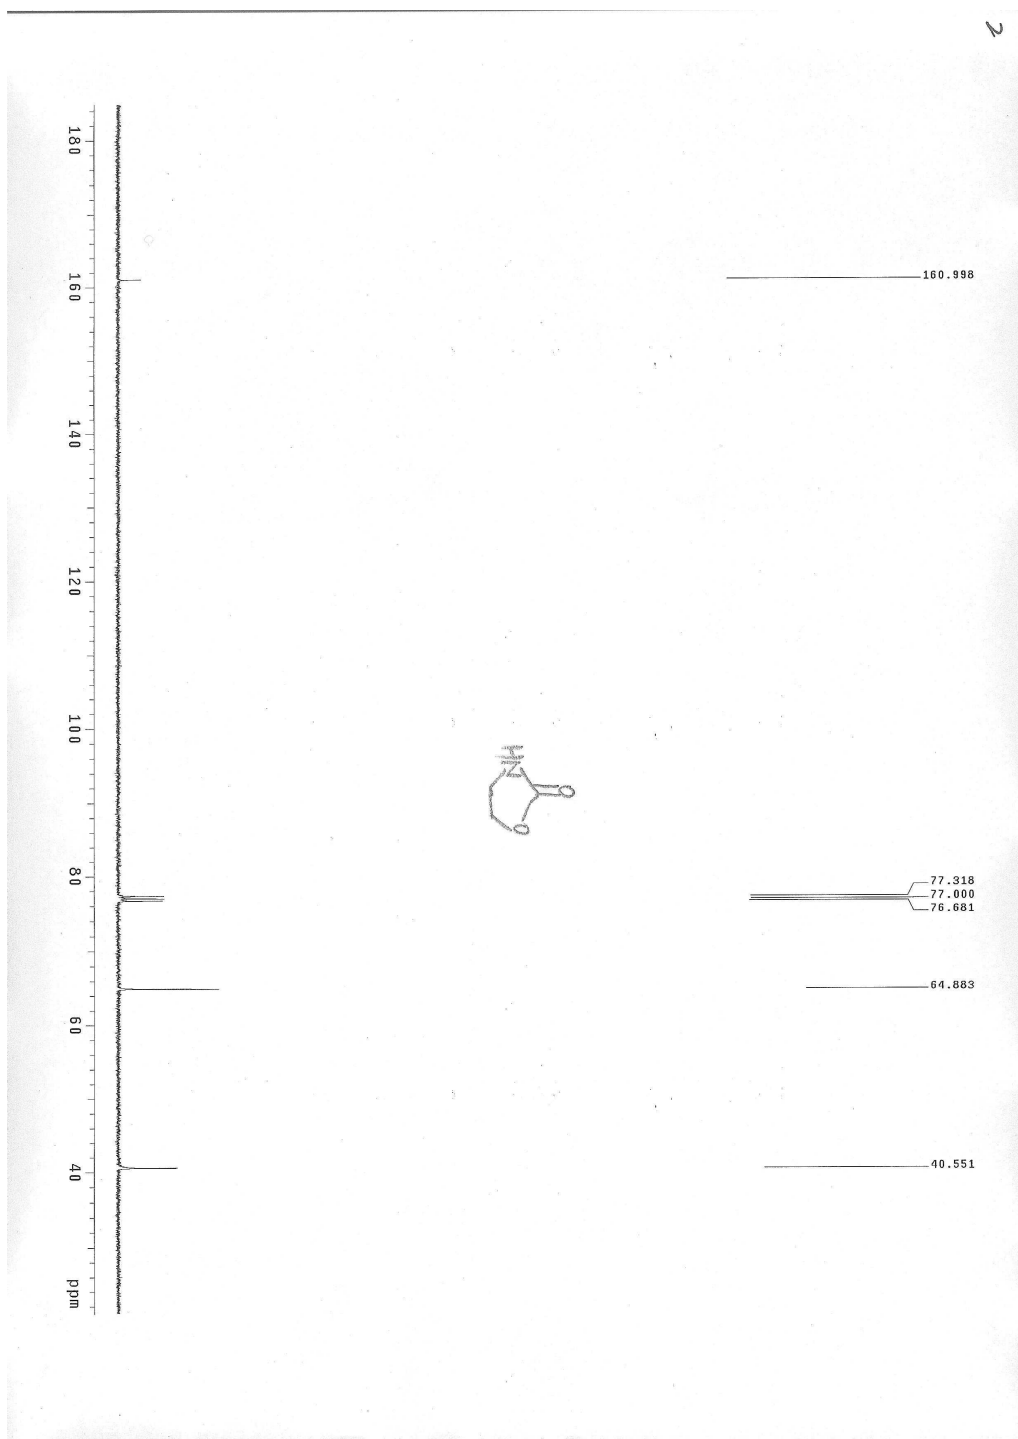

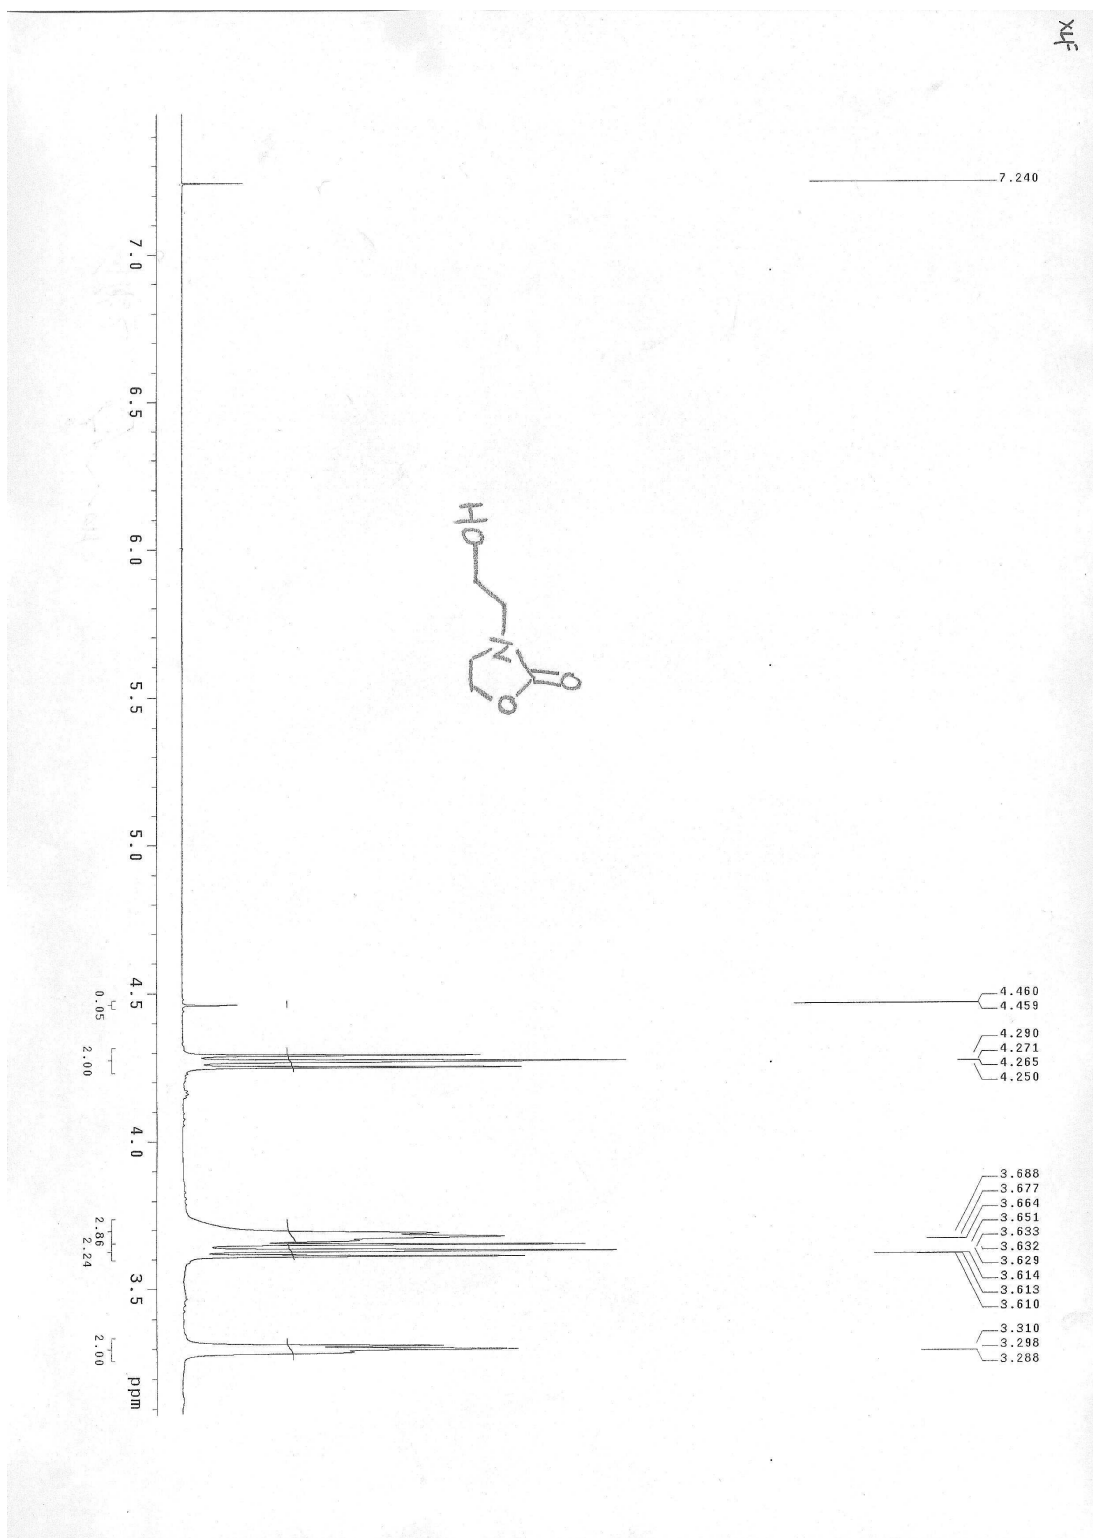

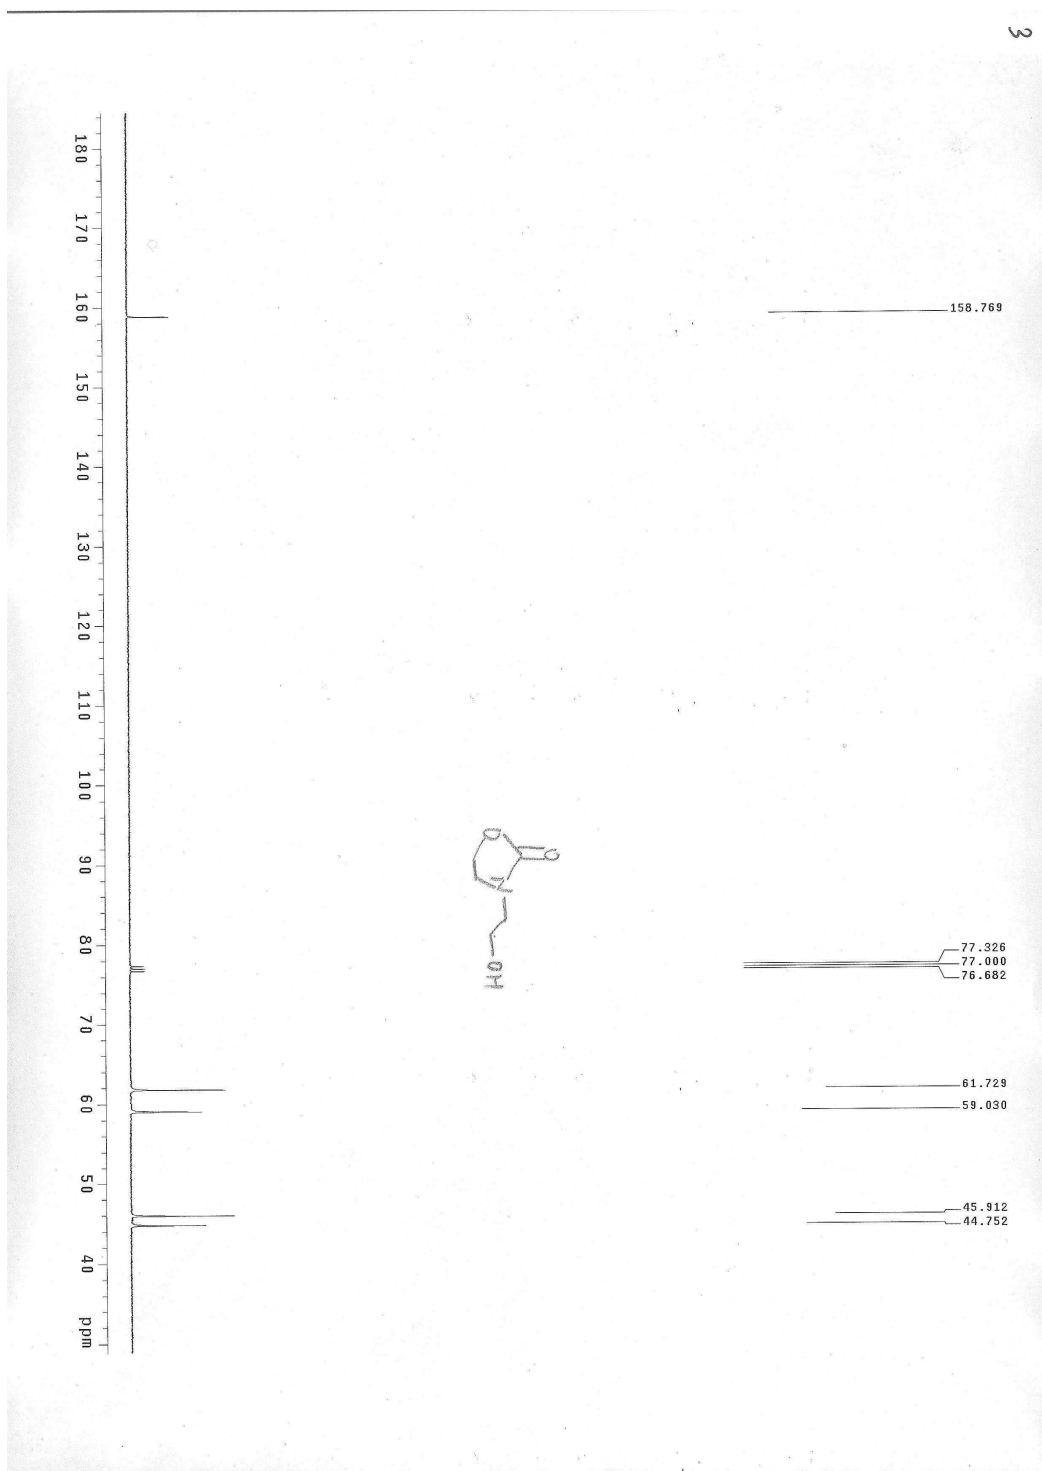

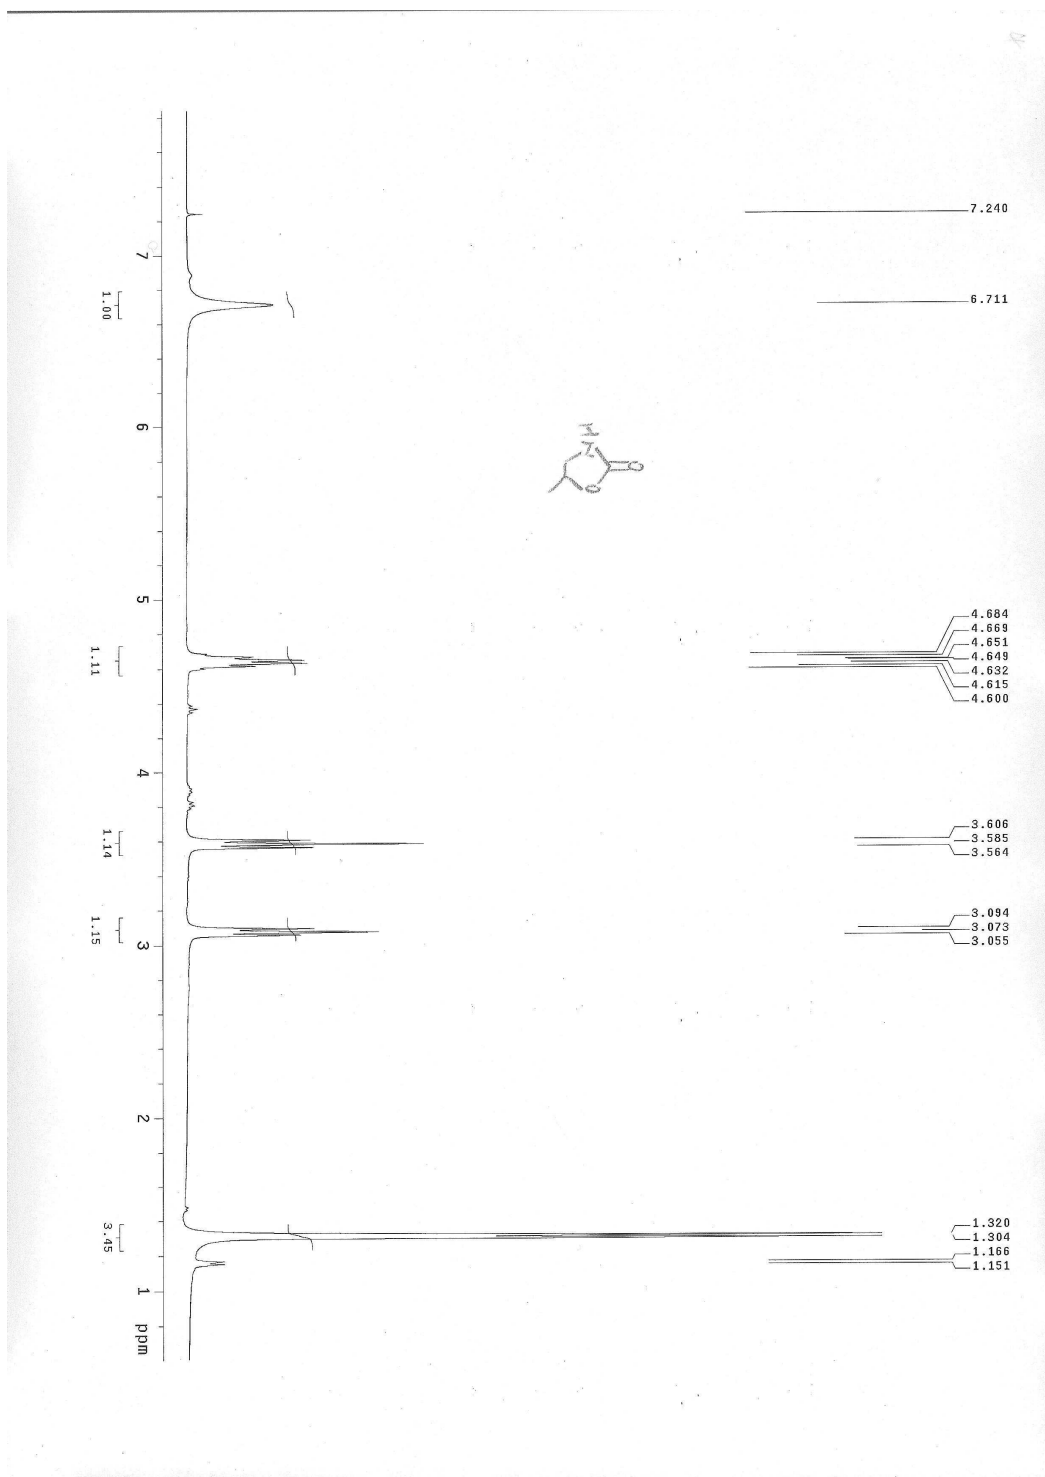

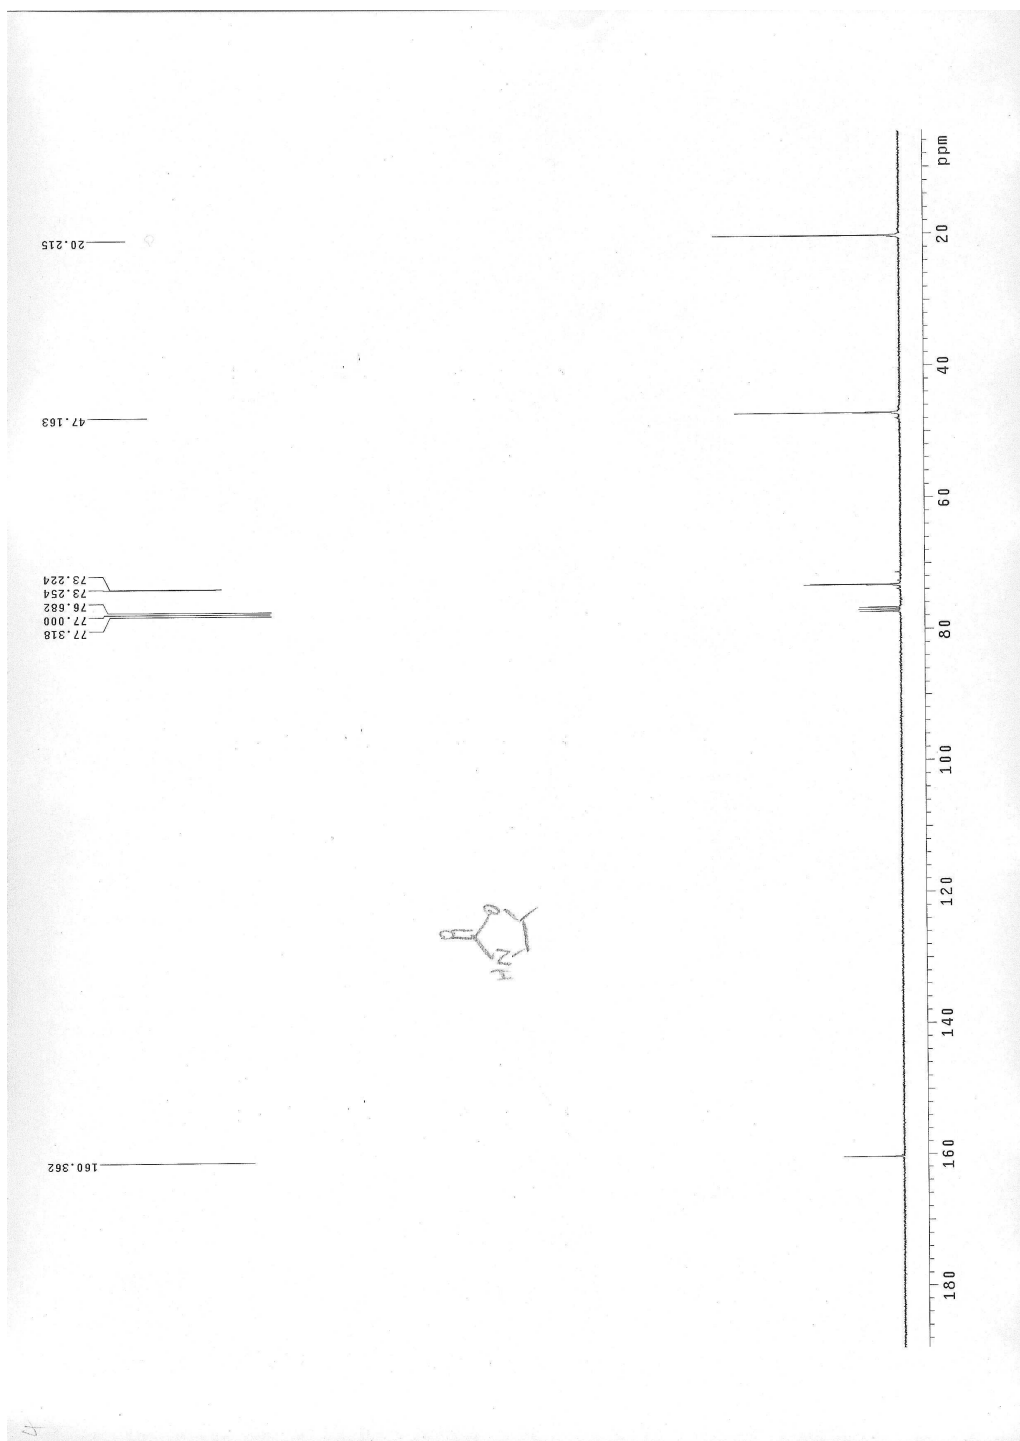

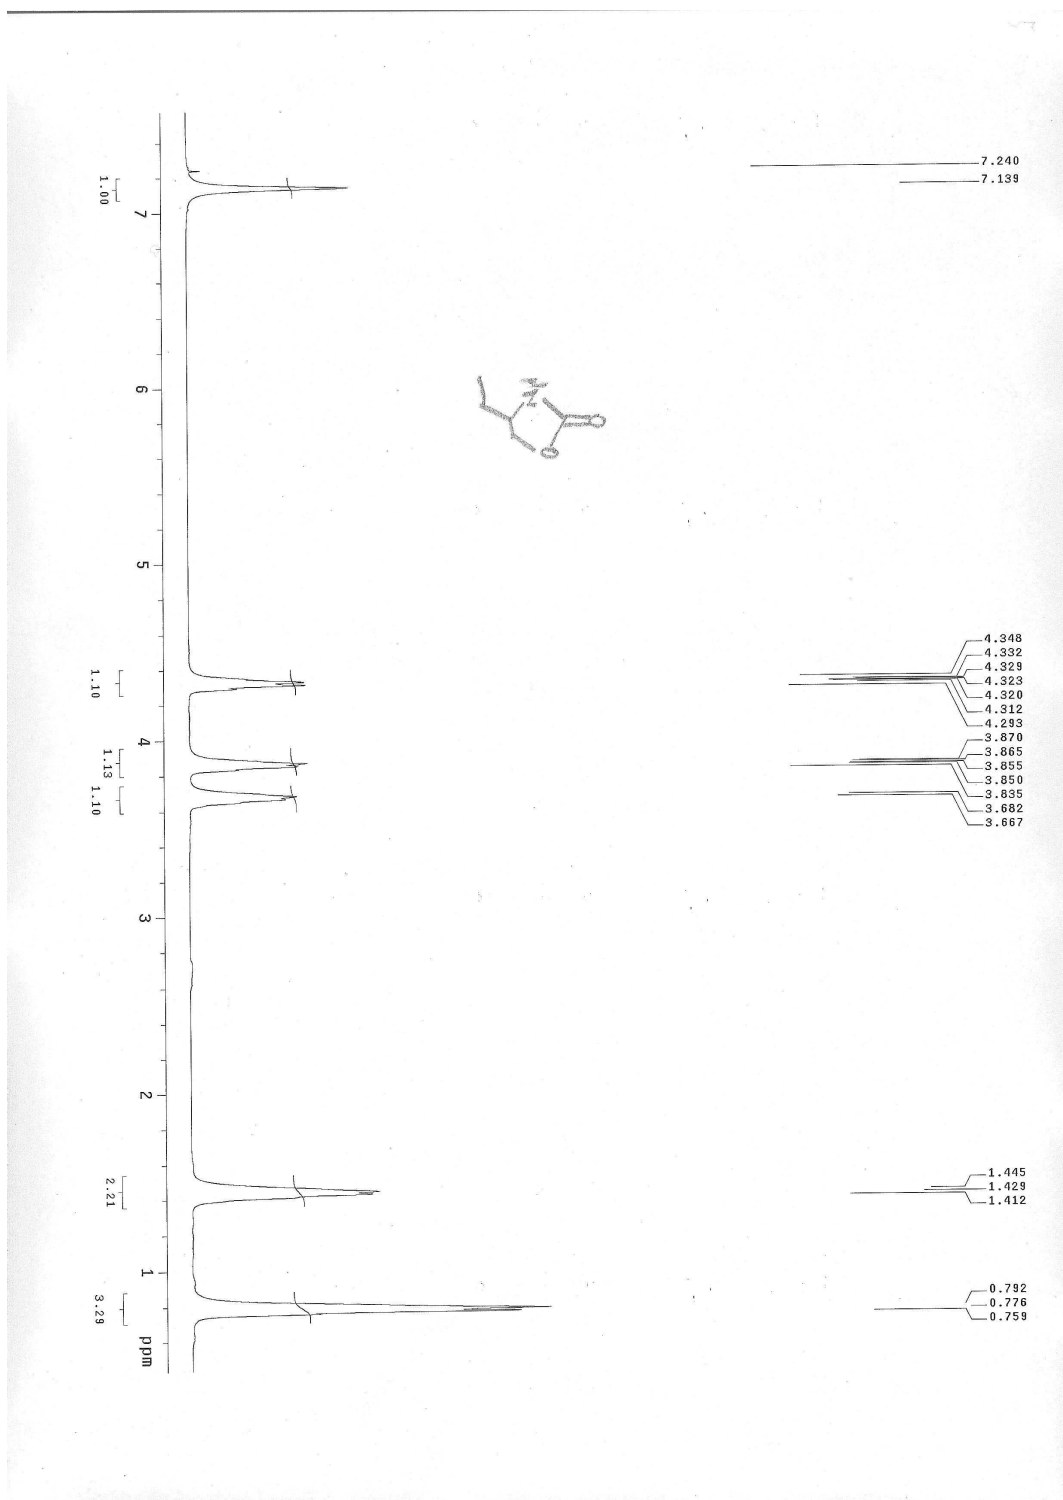



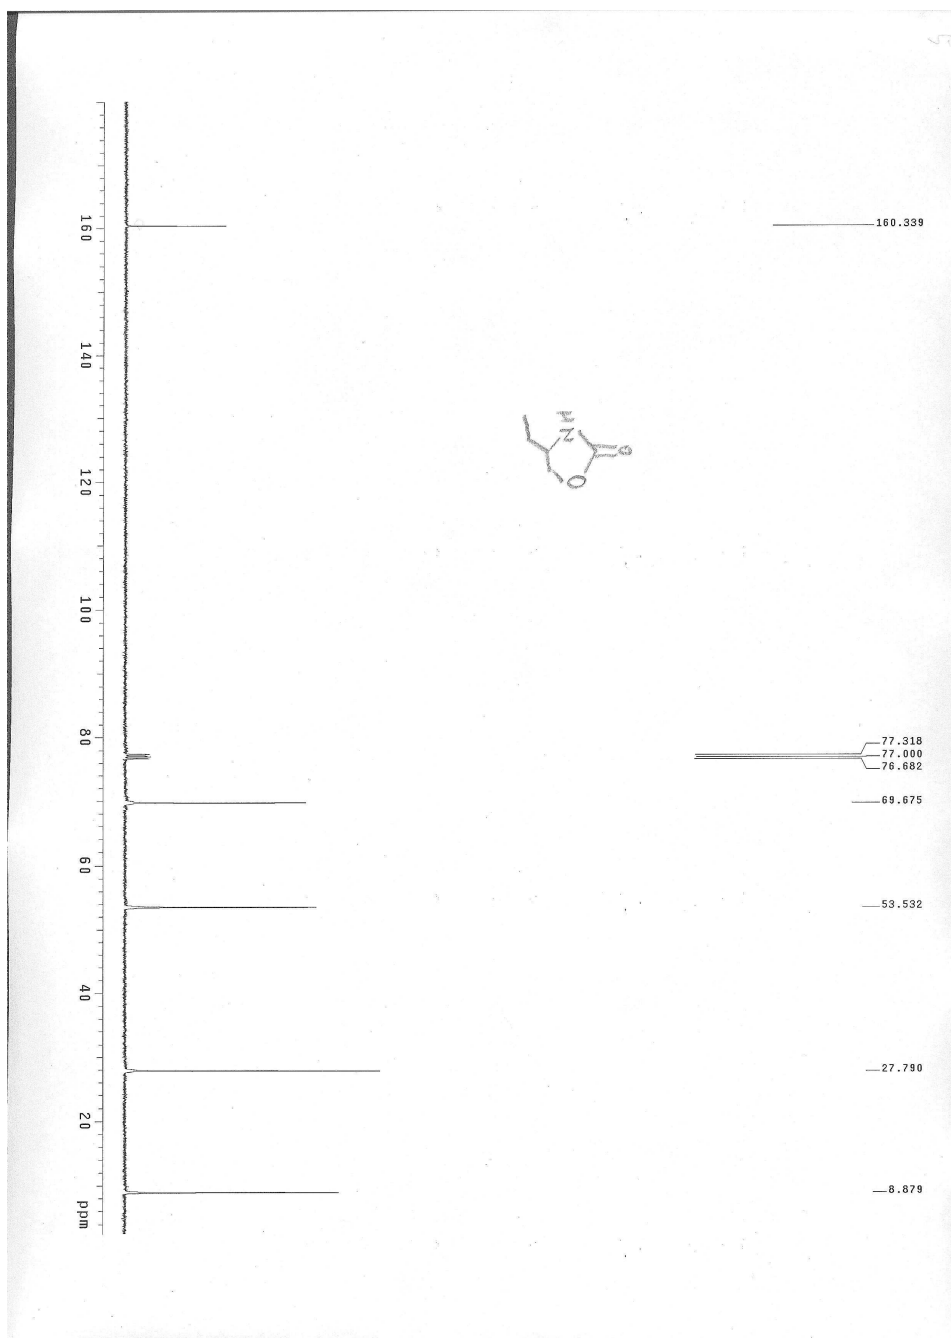

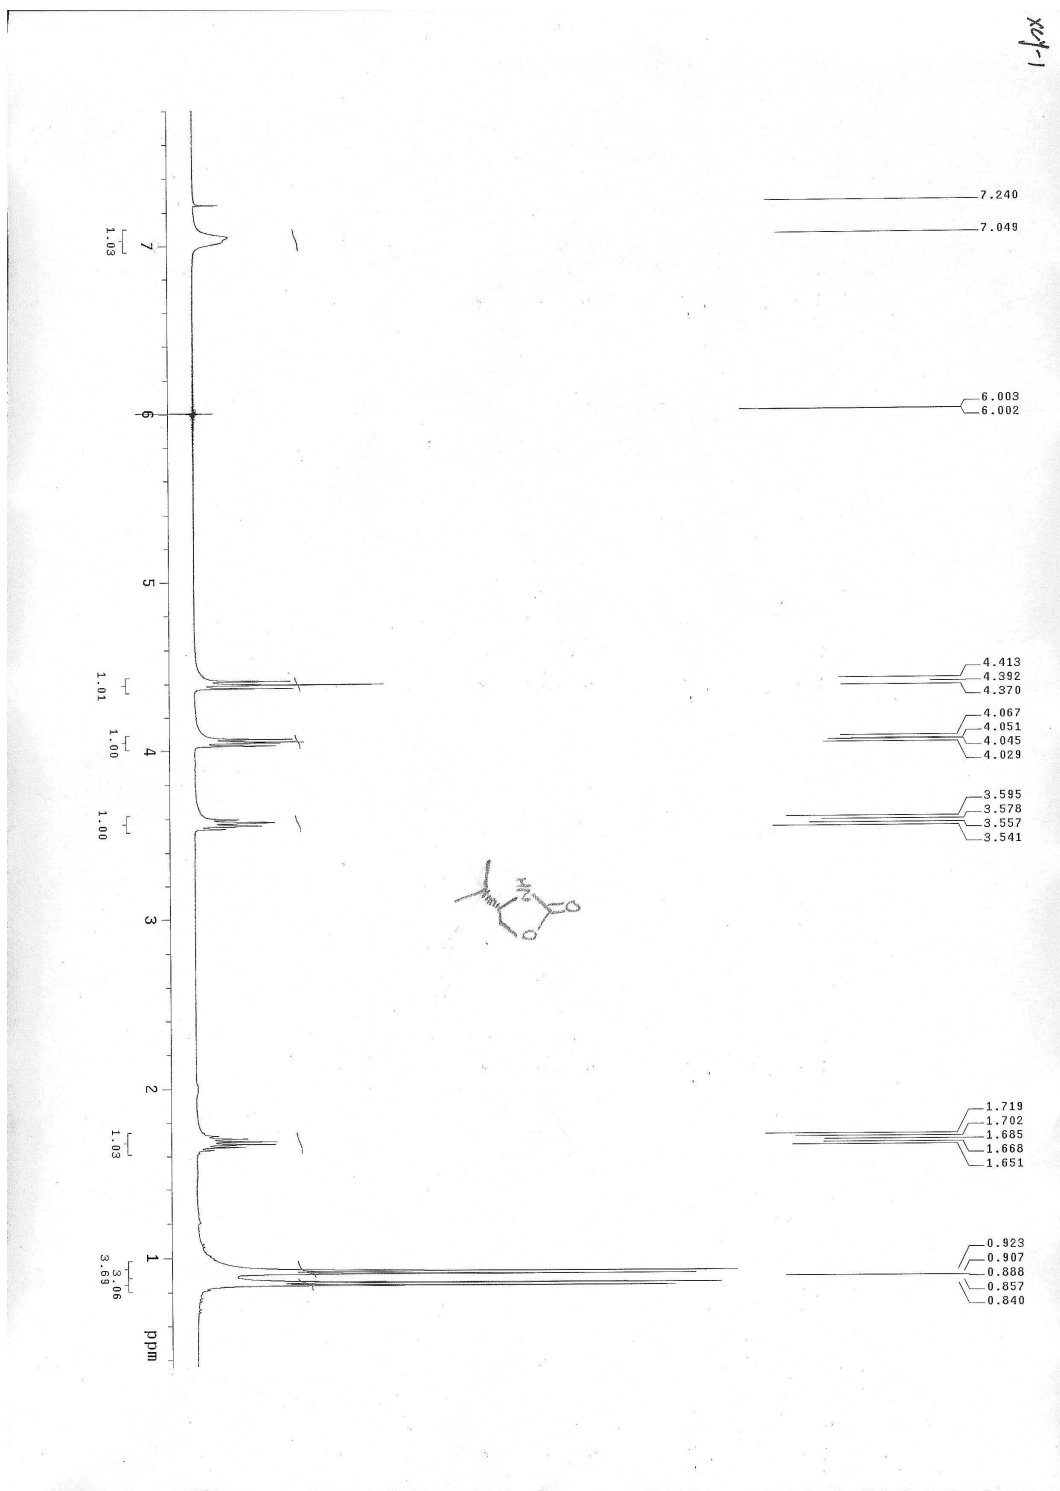

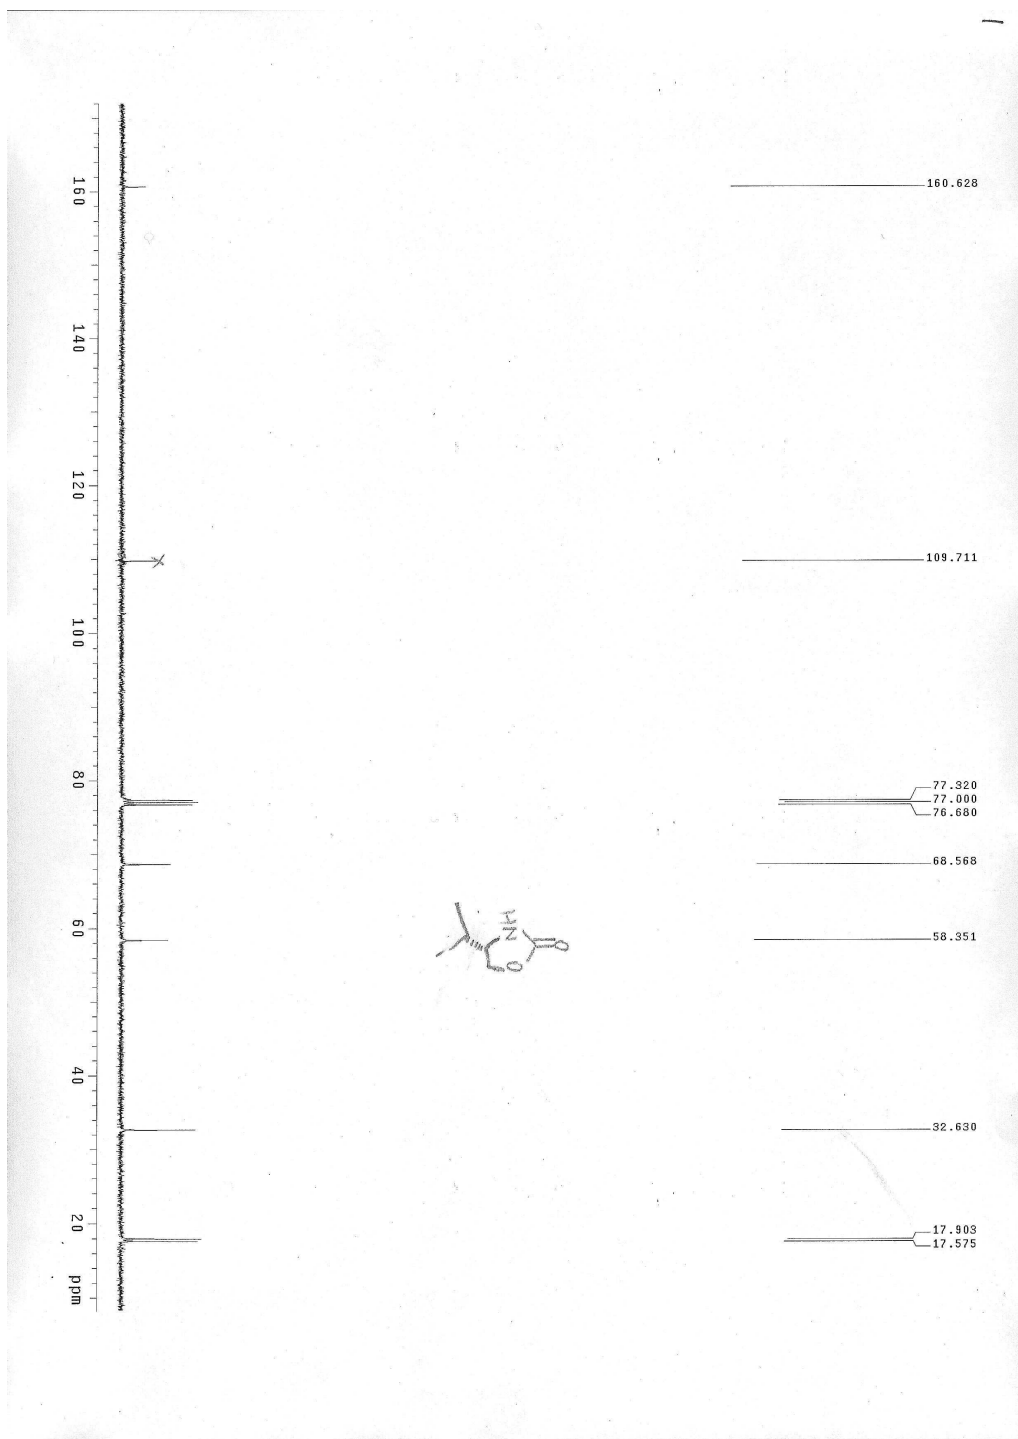

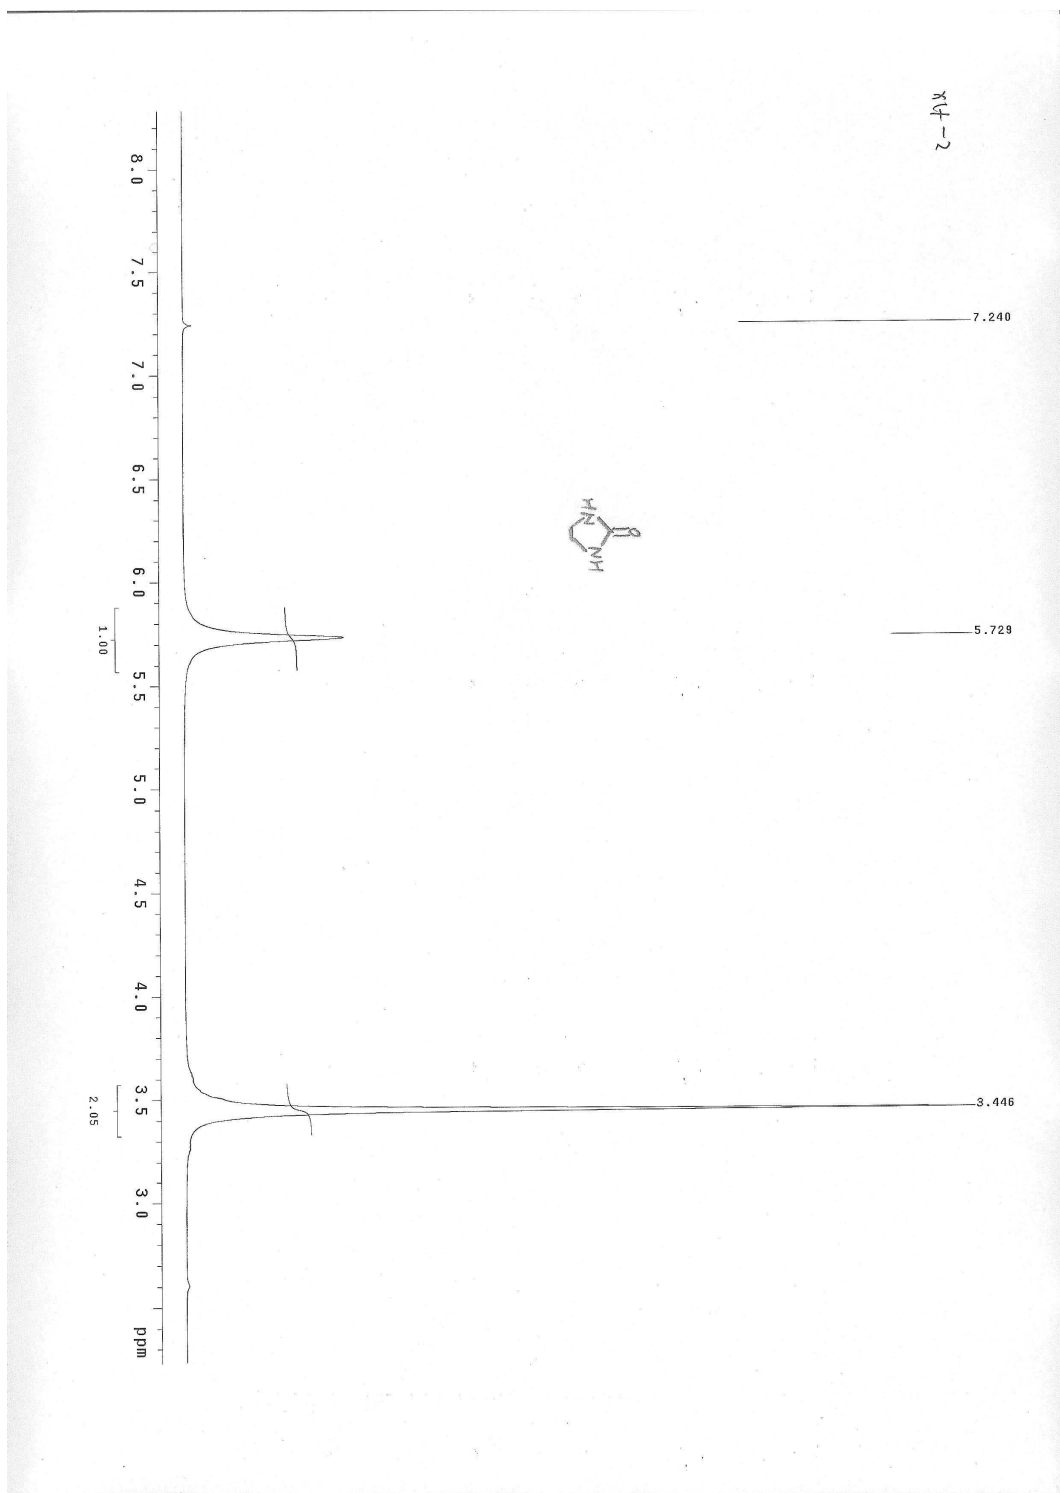

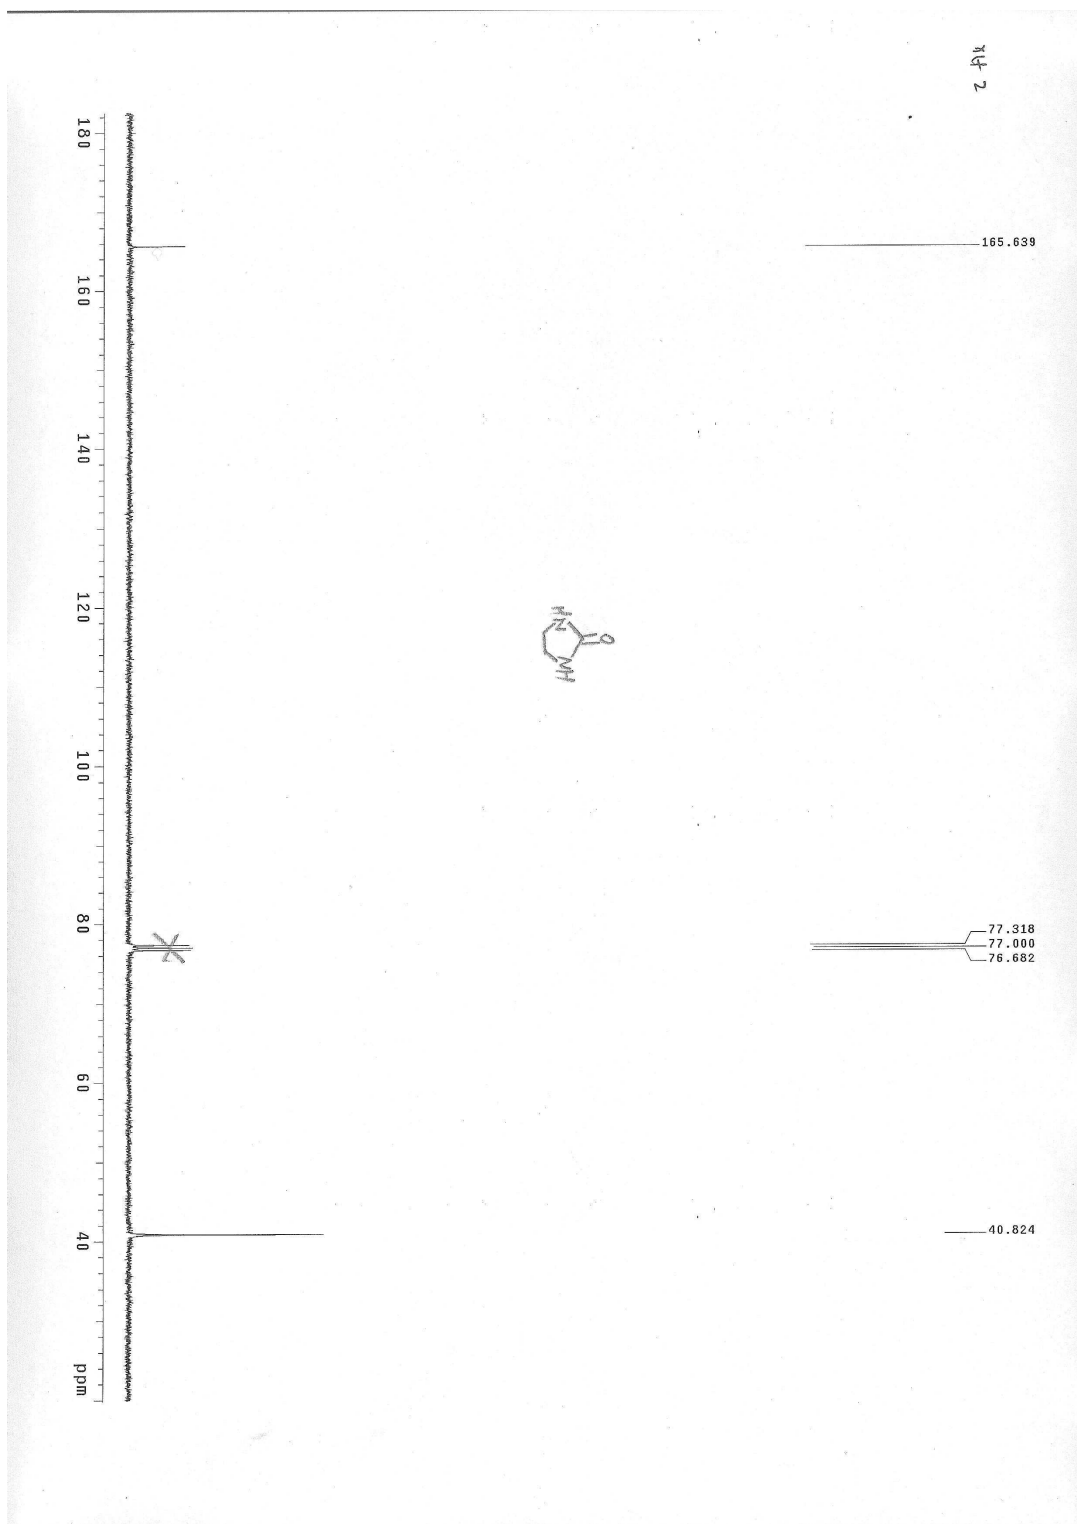

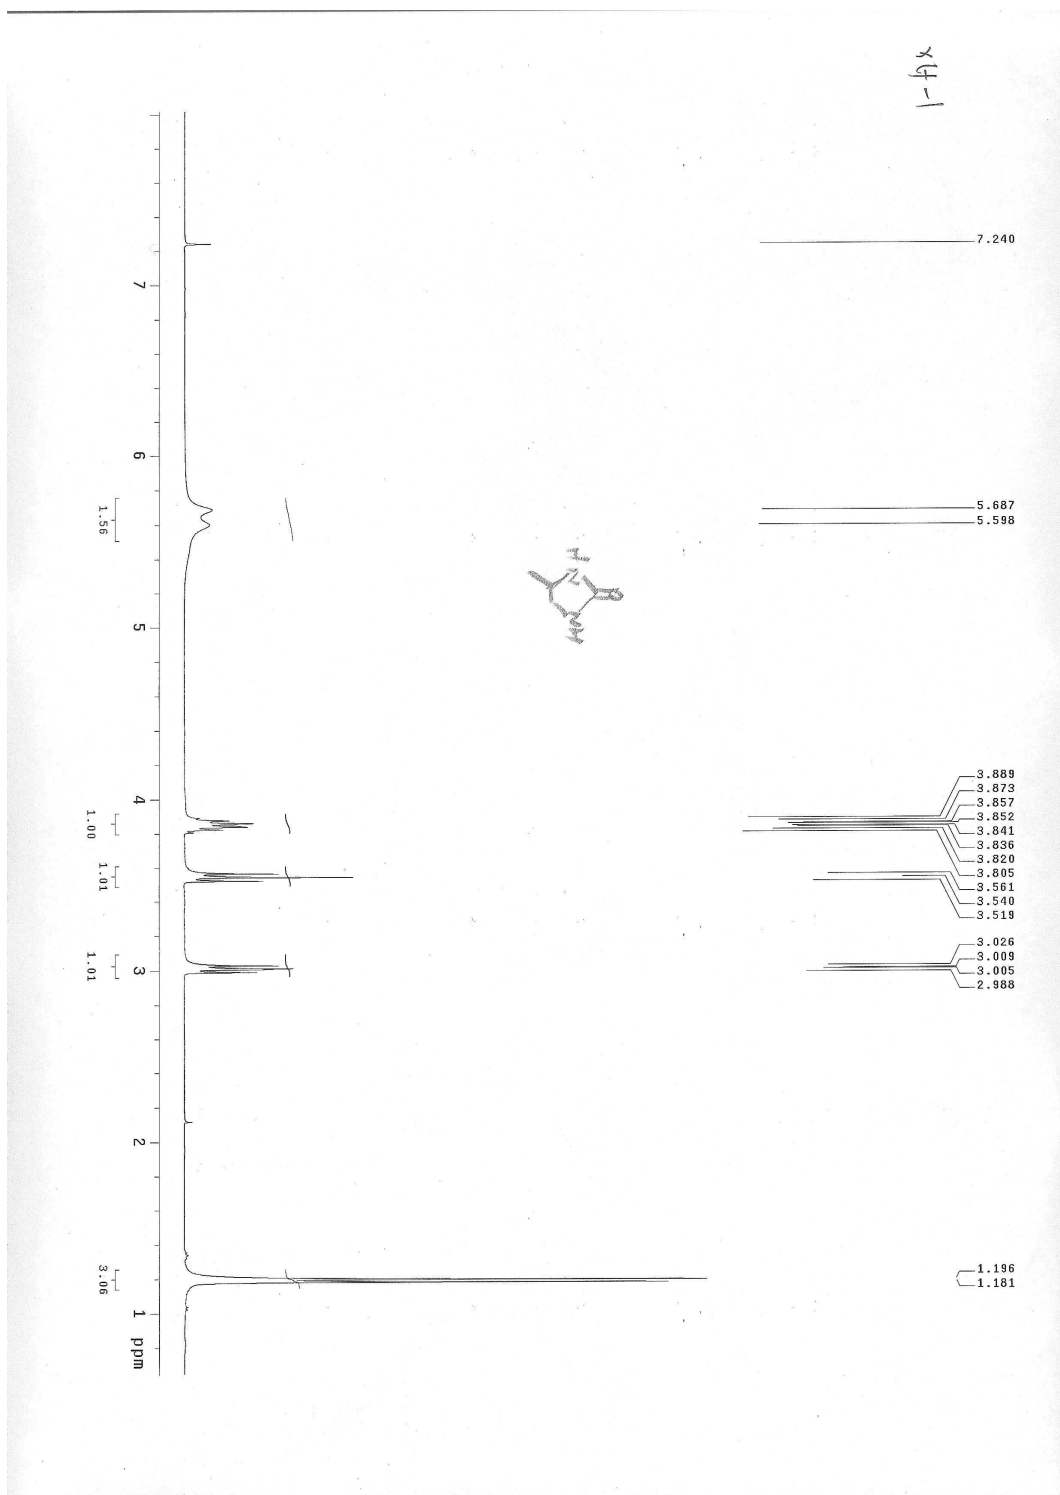

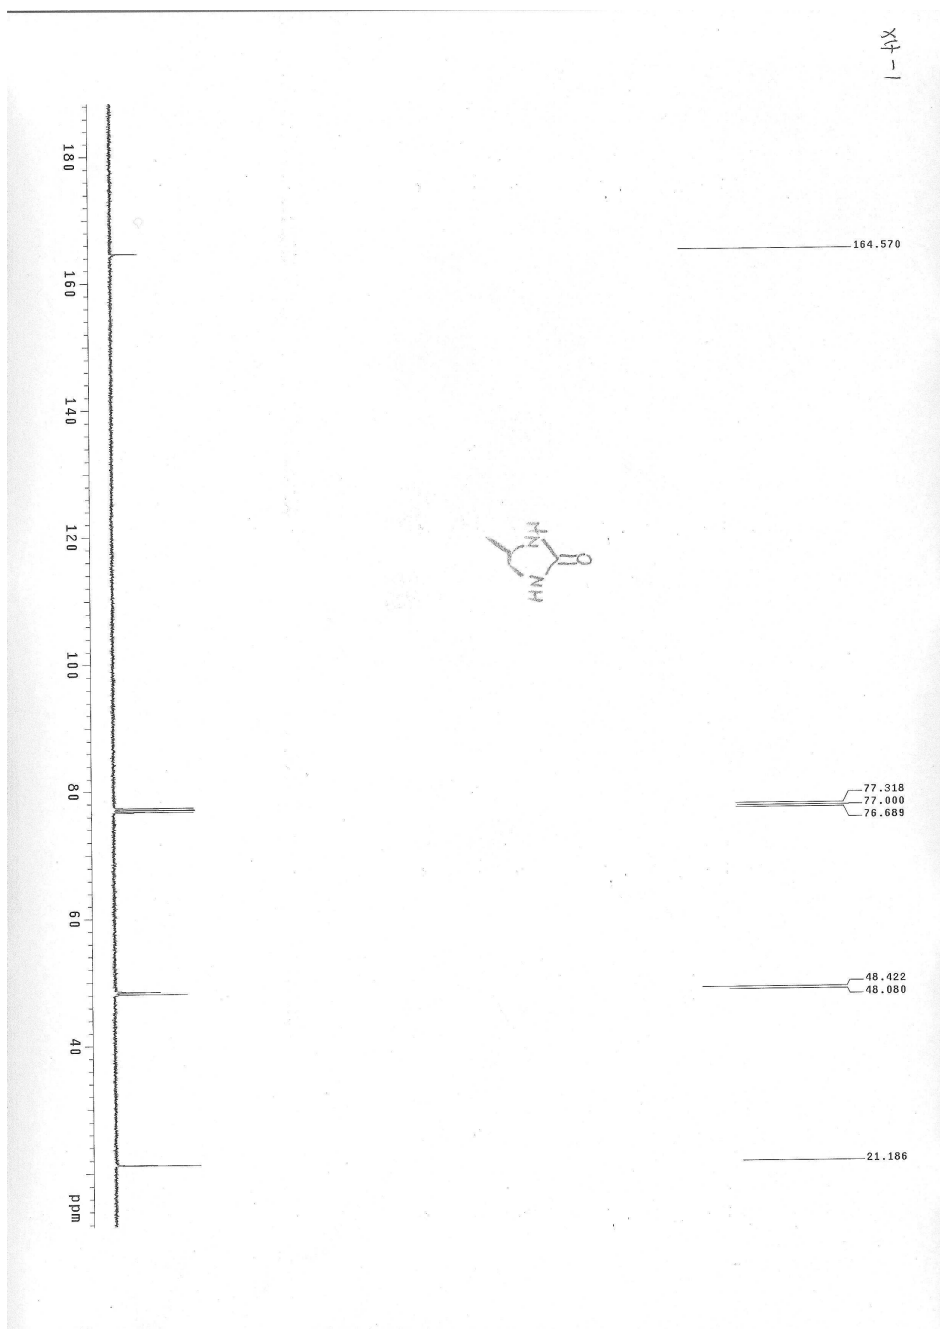

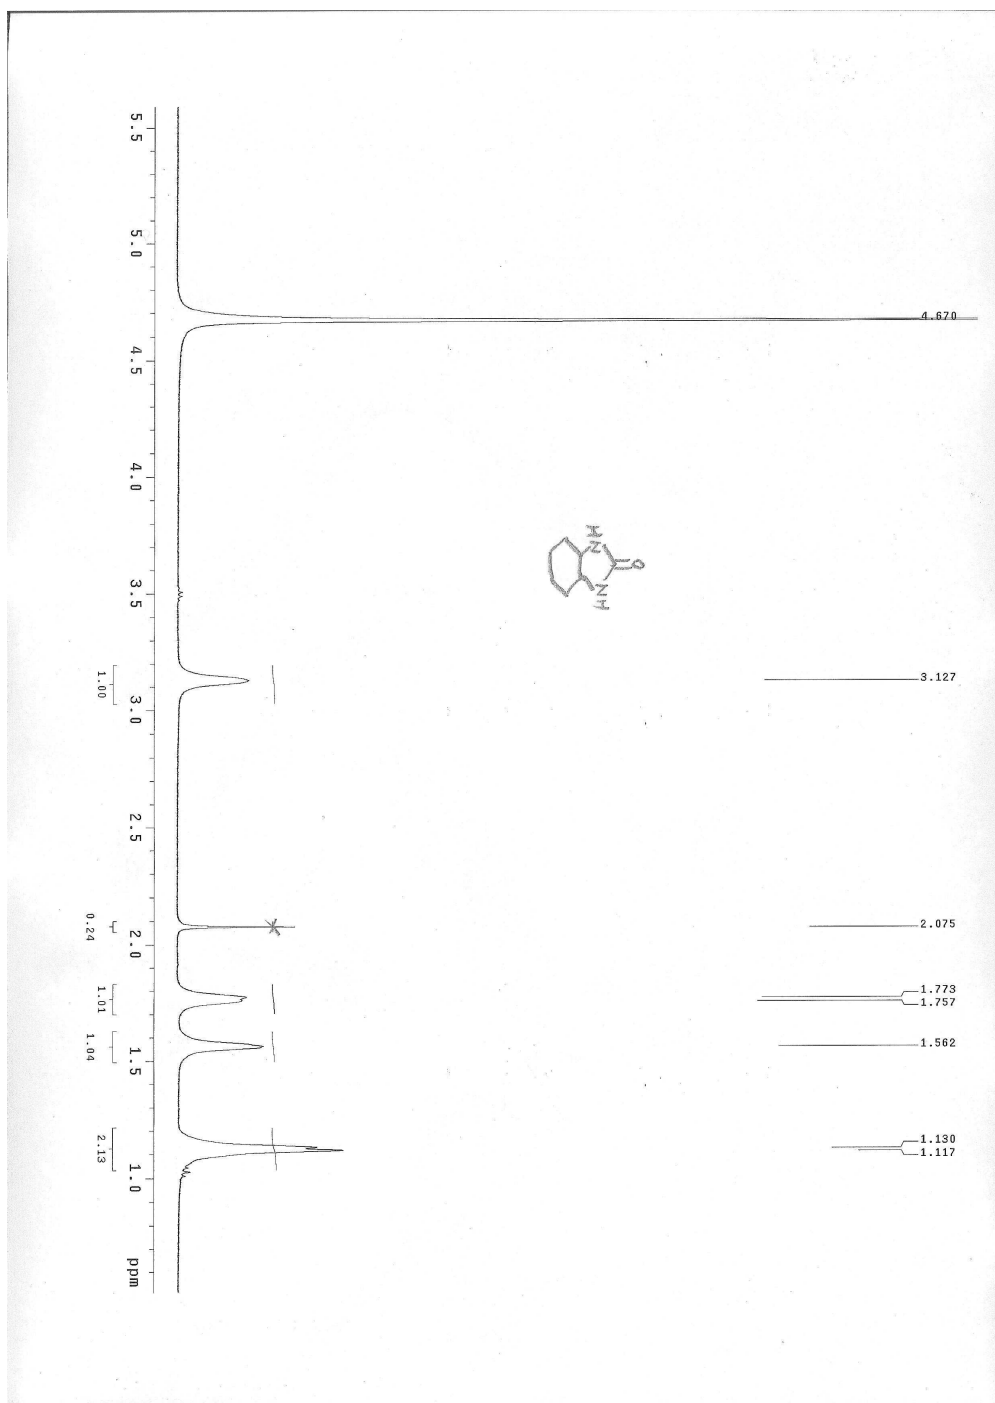



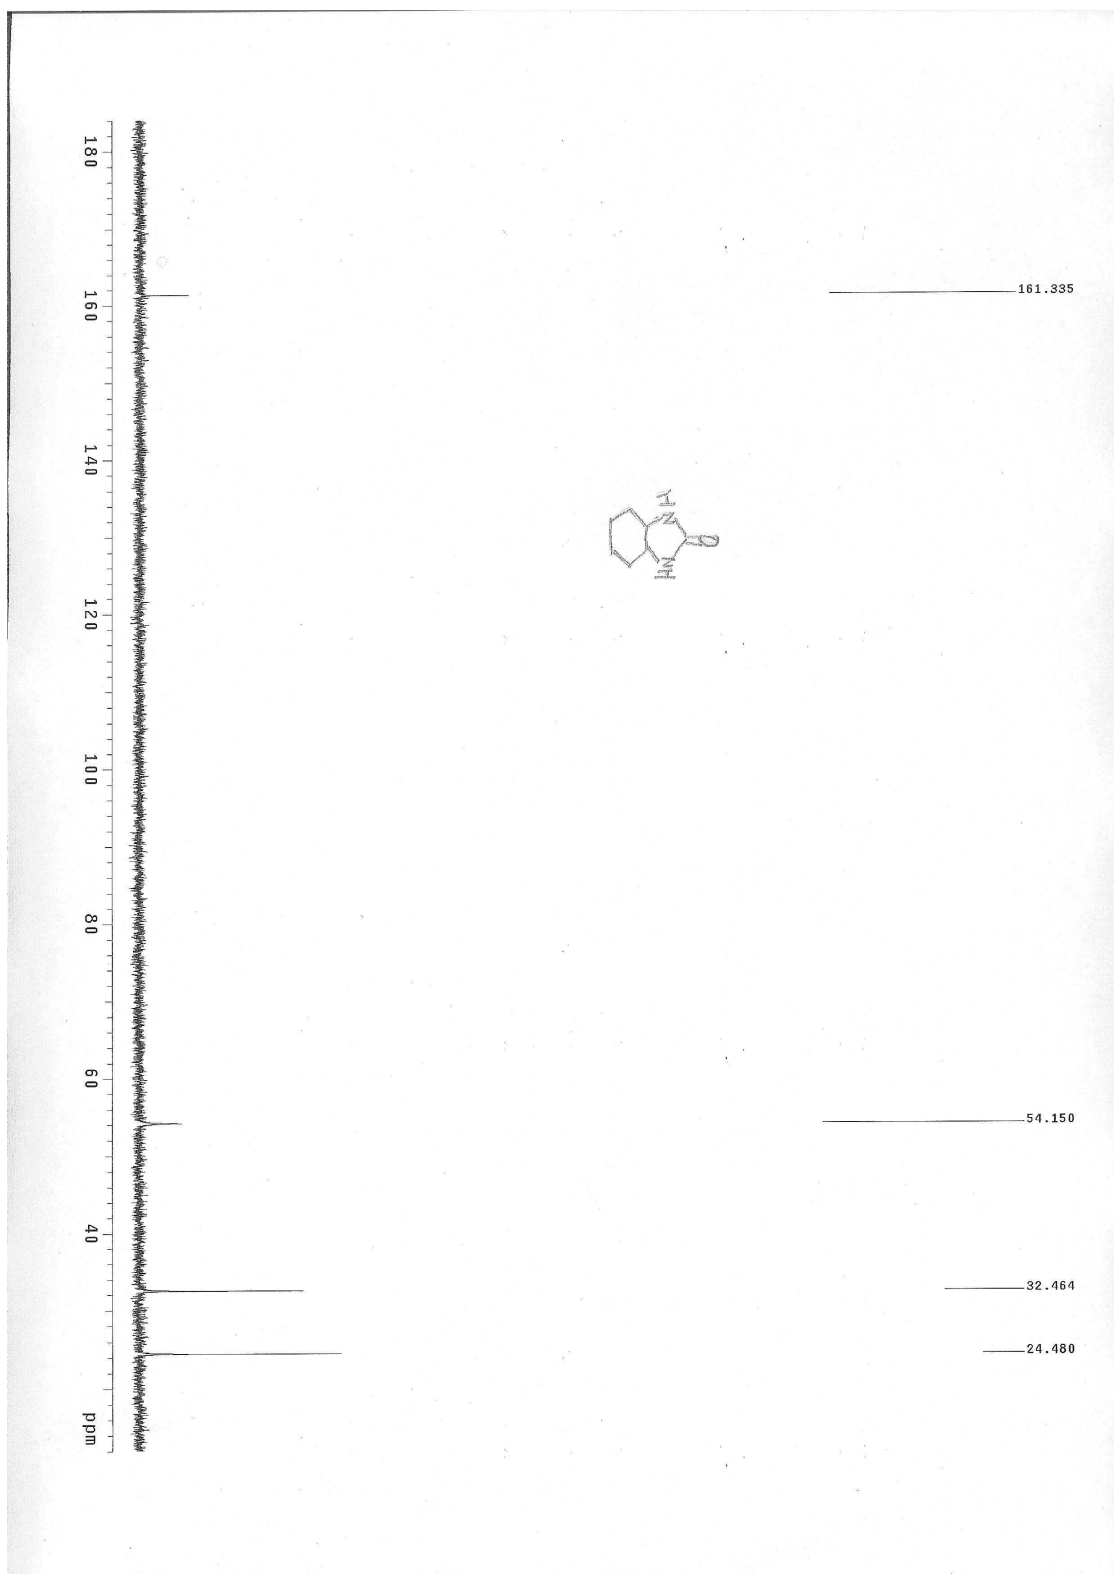

**Reference:**

1. B. M. Bhanage, S. Fujita, Y. Ikushima, M. Arai, *Green Chem.*, 2003, **5**, 340; B. M. Bannge, S. I. Fujita, Y. Ikushima, M. Ari, *Green Chem.*, 2004, **6**, 78, Fuwei Li, Chungu Xia, *J. Catal.*, 2004, **227**, 542; Volume 227, Sudo, Y. Morioka, E. Koizumi, F. Sanda, T. Endo, *Tetrahedron Lett.*, 2003, **44**, 7889; M. Feroci, A. Gennaro, A. Inesi, M. Orsini, L. Palombi, *Tetrahedron Lett.*, 2002, **43**, 5863.
